# Supplementary material for: Alignment of energy levels at the ZnS/Cu(In,Ga)Se2 interface
Source: Royal Society of Chemistry journal article supplement (doi:10.1039/c1ee01292d), 2011-01-01
Supplement: c1ee01292d.pdf [file c1ee01292d.pdf]

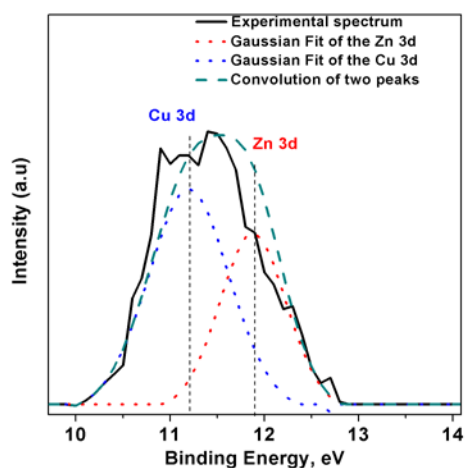

Figure S1. UPS spectra in the vicinity of the Zn 3d and Cu 3d core-level emissions on an expanded scale. The spectra were taken at etch level 15 over an etch time of 1500 s. The peak fitting and deconvolution were performed on the spectrum interval of 10 to 12 eV. The fitting was done after a Shirley-type background subtraction. The peak is decomposed into two Gaussian functions.
